# 1 **Framework for quality assessment of whole genome, cancer sequences**

2 Justin P. Whalley<sup>1,2</sup>, Ivo Buchhalter<sup>3,4</sup>, Esther Rheinbay<sup>5,6</sup>, Keiran M. Raine<sup>7</sup>, Kortine  
3 Kleinheinz<sup>3</sup>, Miranda D. Stobbe<sup>1,2</sup>, Johannes Werner<sup>3</sup>, Sergi Beltran<sup>1,2</sup>, Marta Gut<sup>1,2</sup>,  
4 Daniel Huebschmann<sup>3,4,8</sup>, Barbara Hutter<sup>9</sup>, Dimitri Livitz<sup>5,6</sup>, Marc Perry<sup>10</sup>, Mara  
5 Rosenberg<sup>5,6</sup>, Gordon Saksena<sup>5,6</sup>, Jean-Rémi Trotta<sup>1,2</sup>, Roland Eils<sup>3,4</sup>, Jan Korbel<sup>11</sup>,  
6 Daniela S. Gerhard<sup>12</sup>, Peter Campbell<sup>7</sup>, Gad Getz<sup>5,6,13</sup>, Matthias Schlesner<sup>3</sup>, Ivo G.  
7 Gut<sup>\*1,2</sup>, PCAWG-Tech, PCAWG-QC & PCAWG Network

8 <sup>1</sup>*CNAG-CRG, Centre for Genomic Regulation (CRG), Barcelona Institute of Science and*  
9 *Technology (BIST), Barcelona, Spain*

10 <sup>2</sup>*Universitat Pompeu Fabra (UPF), Barcelona, Spain*

11 <sup>3</sup>*Division of Theoretical Bioinformatics (B080), German Cancer Research Center*  
12 *(DKFZ), Heidelberg, Germany*

13 <sup>4</sup>*Department for Bioinformatics and Functional Genomics, Institute for Pharmacy and*  
14 *Molecular Biotechnology (IPMB) and BioQuant, Heidelberg University, Heidelberg,*  
15 *Germany*

16 <sup>5</sup>*Massachusetts General Hospital Cancer Center and Department of Pathology, Boston,*  
17 *USA*

18 <sup>6</sup>*Broad Institute of Harvard and MIT, Cambridge, MA, USA*

19 <sup>7</sup>*Wellcome Trust Sanger Institute, Hinxton, UK*

20 <sup>8</sup>*Department of Pediatric Immunology, Hematology and Oncology, University Hospital*  
21 *Heidelberg, Heidelberg, Germany*

22 <sup>9</sup>*Division of Applied Bioinformatics (G200), German Cancer Research Center (DKFZ),*  
23 *Heidelberg, Germany*

24 <sup>10</sup>*Ontario Institute for Cancer Research, Toronto, Ontario, Canada*

25 <sup>11</sup>*Genome Biology Unit, European Molecular Biology Laboratory, Heidelberg, Germany*

26 <sup>12</sup>*Office of Cancer Genomics, National Cancer Institute, US National Institutes of Health,*  
27 *Bethesda, MD, USA*

28 <sup>13</sup>*Harvard Medical School, Boston, MA, USA*

29 \*Corresponding author: [ivo.gut@cnag.crg.eu](mailto:ivo.gut@cnag.crg.eu)

30 **Abstract**

31

32 Working with cancer whole genomes sequenced over a period of many years in different  
33 sequencing centres requires a validated framework to compare the quality of these  
34 sequences. The Pan-Cancer Analysis of Whole Genomes (PCAWG) of the International  
35 Cancer Genome Consortium (ICGC), a project a cohort of over 2800 donors provided us  
36 with the challenge of assessing the quality of the genome sequences. A non-redundant set  
37 of five quality control (QC) measurements were assembled and used to establish a star  
38 rating system. These QC measures reflect known differences in sequencing protocol and  
39 provide a guide to downstream analyses of these whole genome sequences. The resulting  
40 QC measures also allowed for exclusion samples of poor quality, providing researchers  
41 within PCAWG, and when the data is released for other researchers, a good idea of the  
42 sequencing quality. For a researcher wishing to apply the QC measures for their data we  
43 provide a Docker Container of the software used to calculate them. We believe that this is  
44 an effective framework of quality measures for whole genome, cancer sequences, which  
45 will be a useful addition to analytical pipelines, as it has to the PCAWG project.

## 46 **Introduction**

47 Combining whole genome sequencing data from individual projects has many  
48 advantages: increased statistical power, the ability to extend hypotheses across several  
49 projects and the possibility of asking biological questions covering a wider range of  
50 phenomena. However when the genome sequencing data comes from different centres,  
51 was sequenced at different times and under different protocols, great care must be taken  
52 to ensure that the sequencing data is of comparable quality, to avoid drawing false  
53 conclusions. The Pan-Cancer Analysis of Whole Genomes (PCAWG) project provided us  
54 with a great opportunity to assemble, test and finalise which quality control measures are  
55 important for comparing the quality of whole genome, cancer sequences.

56 The PCAWG project assembled a cohort of 48 projects encompassed in the International  
57 Cancer Genome Consortium (ICGC)<sup>1</sup> and The Cancer Genome Atlas (TCGA)<sup>2</sup> of which  
58 we analysed 2959 cancer genomes (normal-tumour genome pairs) from 2830 donors. The  
59 size of the dataset and the diversity of the samples, representing many different cancers  
60 from varied populations, allow the exploration of many fundamental questions of cancer.  
61 There was inclusion criteria based on the sequencing platform (Illumina) and minimum  
62 sequencing depth. However there were 18 different sequencing centres involved and the  
63 sequencing was performed over a five-year time-span (2009-2014: a time period in which  
64 the sequencing methodology was evolving rapidly). To be able to perform analysis across  
65 the whole data set, it was necessary that the quality of the sequencing be carefully  
66 assessed.

67 There are advantages in a comprehensive set of quality measures. We will be able to

68 exclude samples of low quality. This will save running downstream analyses, saving  
69 computational and the researchers' time. Another advantage is for researchers in  
70 PCAWG studying driver mutations, we can provide a sanity check. If the driver mutation  
71 is only found in low quality samples, it may not be a good candidate, compared to if it is  
72 supported by high quality samples. As PCAWG will release the data for community to  
73 use, our quality measures will provide a guide to the quality of the whole genome  
74 sequences within. For researchers who wish to assess the quality of their whole genome  
75 cancer sequences, we have released our methods, in a Docker Container for easy  
76 implementation.

77

78 To develop a framework to determine the quality of samples, we use methods employed  
79 by the sequencing centres involved in PCAWG as well as results in the literature. TCGA  
80 marker papers (see references<sup>3-5</sup> for examples from 2014-16) all include quality control  
81 (QC) measures such as depth of coverage, batch effects and contamination levels,  
82 calculated as part of the Firehose analysis infrastructure. Likewise a recent ICGC paper<sup>6</sup>  
83 with samples sequenced from three different centres relied on similar QC measures  
84 computed by the Picard toolkit. Lu et al.<sup>7</sup>, carried out meta-analysis of exome data  
85 available from the TCGA for 12 cancer types which is similar, but not identical in scope,  
86 to the data set examined here. Their inclusion criteria were based on coverage depth and  
87 percentage of exome coverage for both the normal and tumour samples. Other cancer  
88 studies have also pointed to the importance of the percentage of the genome covered<sup>8,9</sup> as  
89 well as error rates for each of the paired reads<sup>10</sup> as QC measures.

90 Here we present the results of the work by sequencing centres and research groups  
91 involved in PCAWG to define important quality control measures, and how best to  
92 combine the results from these measures. Based on the PCAWG data we selected  
93 measures covering five important features to assess the quality of cancer genome  
94 sequences: mean coverage, evenness of coverage, somatic mutation calling coverage,  
95 paired reads mapping to different chromosomes and the ratio of difference in edits  
96 between paired reads, an edit being a base in the read which is different to the reference  
97 genome. These measurements we computed for both the normal and tumour samples. To  
98 summarise the five QC measures, we established a star rating system to cover the range  
99 of the highest quality cancer genomes, passing the thresholds set for each measurement,  
100 to those that had many sequencing quality issues.

## 101 **Results**

102 All our analyses are based on the aligned sequences from the PCAWG core pipeline<sup>11</sup>.  
103 Within the aligned sequences we did not use duplicate reads, reads with a mapping  
104 quality of zero and ignored supplementary alignments (reads that map to more than one  
105 place in the genome). The first three quality control measures; mean coverage, evenness  
106 of coverage and somatic mutation calling coverage; are linked to different aspects of the  
107 coverage of the genomic sequence. The other two measures indicate discrepancies  
108 between the paired reads: mapping to different chromosomes and the ratio of edits  
109 between the paired reads compared to the reference genome. Finally we summarise these  
110 five measures into a star rating, for easy comparison of each of the sample pair's quality.

111 **Mean Coverage** When deciding on what depth to sequence cancer genomes to, a trade

112 off has to be made between the advantages of having a high coverage to the cost of  
113 sequencing. The higher the cancer genome is sequenced the greater the confidence in  
114 calling somatic events (see Alioto et al.<sup>12</sup> for a comparison of somatic mutation calling at  
115 depths up to 300X). A precondition for the inclusion of a donor in the PCAWG study was  
116 the availability of a whole genome sequence of the normal and tumour with 25X  
117 coverage or greater. We found that a number of the projects submitting these genomes  
118 had calculated coverage differently. For standardization the mean number of reads  
119 covering each position in the genome was calculated, after low quality and duplicate  
120 reads were excluded so to not inflate the number of reads (see *Supplementary Methods*  
121 for exact methods used). As shown in *Supplementary Figure S1*, most commonly the  
122 normal samples were sequenced to around 30X, while there was a bimodal distribution  
123 for the tumour samples with maxima at 38X and 60X. To provide a meaningful guide to  
124 the quality of the genomes in PCAWG, we therefore set the thresholds for the mean  
125 coverage, after aligning, to 25X for normal samples and 30X for tumour samples. This  
126 resulted in 0.4% normal and 2.2% tumour samples not reaching these minimum criteria  
127 (*Supplementary Figure S1*).

128 **Evenness of Coverage** To confidently identify germline variants and somatic mutations,  
129 an even coverage across the target area<sup>13</sup>, in this case the entire genome, is ideal. For this  
130 QC measure we used two methods to test if the genome is evenly covered. One method is  
131 to calculate the ratio of the median coverage over the mean coverage (MoM). An evenly  
132 covered sequence should have a ratio of one, with the mean value the same as the median  
133 value, not skewed by very low or high coverage in certain regions. To decide within what  
134 range of values a sample should fall to be regarded as evenly covered, we used the

135 whiskers of the boxplots in *Figure 1*,  $1.5 \times$  I.Q.R (interquartile range) of the data, which  
136 results in the range of 0.99 - 1.06 for a normal sample and the wider range of 0.92 - 1.09  
137 for the tumour samples (*Supplementary Figure S2*).

138 The second measure of evenness looks at the variation of the normalised coverage in ten  
139 kilobase genomic windows, after correction for GC-dependent coverage bias using the  
140 somatic CNV calling algorithm ACEseq<sup>14</sup> (*Figure 2*). The main cloud, which corresponds  
141 to the main copy number state of the sample, is determined (as shown by the red dots in  
142 *Figure 2*). The remaining coverage variation is measured as full width at half maximum  
143 (FWHM) of the main cloud. This measure is insensitive to copy number aberrations and  
144 GC-dependent coverage bias. To determine the thresholds, 1000 WGS samples from  
145 different tumour types were used. We chose the thresholds based on clustering of these  
146 samples and subsequent visual inspection of the "best" samples that exceeded the  
147 threshold to see whether they are valid. Using these results the thresholds chosen are  
148 0.205 for the normal and the more lenient 0.34 for the tumour, above which the sample  
149 would be regarded as having an uneven coverage (*Supplementary Figure S3*).

150 For MoM coverage ratio and for FWHM, there is a greater range of values for the tumour  
151 samples than normal samples, potentially due to biologically reasons valid for tumours,  
152 for example large deletions could lead to a more unevenly covered sample. If the normal  
153 sample is unevenly covered, it is more likely due to a sequencing artefact. Hence, we are  
154 more stringent for the normal than the tumour samples.

155 The two evenness measures identify different samples as having uneven coverage (*Figure*  
156 *3*). Spearman's correlation coefficient for the two measures suggests that these measures



157 are not correlated for the normal ( $\rho = 0.24$ ) and tumour ( $\rho = -0.06$ ) samples. FWHM is  
158 insensitive to GC bias, as the CNV caller corrects for this while MoM identifies other  
159 evenness outliers.

160 The samples needs to be in the respective ranges of the MoM and below the thresholds  
161 for FWHM for the normal and the tumour to pass the evenness quality measure, of which  
162 6.28% and 5.81% respectively of the samples were not.

163 **Somatic Mutation Calling Coverage** Having the depth of and evenness of coverage  
164 measured, our next QC measure looks at the effect of these at each base in the cancer  
165 genome (both the normal and the tumour sample). This measure gives a good summary of  
166 how much of the cancer genome is sufficiently covered to call a somatic mutation event.  
167 The somatic mutation caller MuTect<sup>15</sup> calculates for each base in the genome, if it has  
168 sufficient coverage in both the normal and tumour sample (least fourteen reads are  
169 present in the tumour and eight reads in the matched normal sample). Based on those  
170 requirements, we had to establish the number of bases to consider the sample sufficiently  
171 covered. Ideally the threshold should be high enough to penalise the less well-sequenced  
172 samples, while not unduly penalising tumour samples that have had large deletions in the  
173 genome resulting in fewer bases to sequence. Taking into account the largest  
174 unambiguous mapping for a female donor (so not including the Y chromosome) would be  
175 2,835,690,481 bases<sup>16</sup>, 2.6 gigabases would best suit these two needs. This results in  
176 5.95% of normal-tumour pairs with fewer bases sufficiently covered, than this threshold  
177 (*Supplementary Figure S4*).

178 **Paired reads mapping to different chromosomes** The two reads from a read pair

179 should represent the ends of a contiguous DNA sequence that depending on the insert  
180 size should be a given distance apart (for PCAWG between 200 and 1,000 bases). Paired  
181 reads mapping to different chromosomes can be due to a rearrangement. However an  
182 excess of reads mapping to different chromosomes points to a technical artefact. So  
183 deciding a threshold based on percentage of paired reads mapping to different  
184 chromosomes, we should not penalise sequences with biological causes of the paired  
185 reads mapping to different chromosomes (such as chromothripsis<sup>17</sup>, or more generally,  
186 interchromosomal rearrangements). We set the threshold to 3%, which even samples with  
187 confirmed high levels of rearrangements and chromothripsis do not exceed which in our  
188 experience, do not have more than 1% of paired reads mapping to different  
189 chromosomes. Of the normal sequences 14.5% exceed the threshold, as do 13.0% tumour  
190 sequences (*Supplementary Figure S5*). Interestingly there are more normal samples  
191 failing this measure, which cannot be explained by biological processes. A possible  
192 explanation may be that for lower quality samples in preparing libraries with PCR  
193 amplification causes an increase in two fragments of DNA from different parts of the  
194 genome being fused together, as has previously been noted<sup>18</sup>. Consequently, this  
195 translates to an increase in percentage of paired reads mapping to different chromosomes.

196 **Ratio of difference in edits between paired reads** Damage in sequencing runs has been  
197 linked to a global imbalance in edits (where the base in read is different compared to the  
198 reference) between read 1 and read 2 in paired end sequencing<sup>19</sup>. Therefore the ratio of  
199 the sum of edits between paired reads for a well-sequenced sample should be close to  
200 one. We adjudged samples with a two-fold ratio of edits between the paired reads, or  
201 greater, as having something gone wrong in the sequencing cycle resulting in lower data

202 quality. Based on this threshold 4.66% and 4.49% normal and tumour samples failed  
203 respectively.

204 **Summary** The five quality measures were selected to provide minimal redundancy in  
205 flagging quality issues in normal/tumour paired genome sequences, which each measure  
206 reflects a facet of sequencing quality that other measures do not. *Figure 4* shows there is  
207 some overlap between certain measures, for example 75 sample pairs are penalised by  
208 both having a high percentage paired reads mapping to different chromosomes and  
209 uneven coverage. However a much higher number of samples penalised by one of these  
210 measures and not the other. Having defined these five, non-redundant QC measures our  
211 next step was to summarise them, to give an overall score for quality for the other  
212 researchers in PCAWG to use.

### 213 **Star rating system**

214 We used the five quality measures to construct a star rating for each cancer genome  
215 (normal/tumour whole genome sequence). For each QC measure a star is awarded if both  
216 the normal and tumour sample pass the threshold. Half a star is awarded if only the  
217 normal passes the threshold for the respective QC measures. For somatic mutation calling  
218 coverage, a whole star is awarded for passing, none otherwise. The reasons for the extra  
219 weighting of the normal sample for the other four measures are that there is no biological  
220 reason for low quality in the normal sequence and a well-sequenced normal sample is  
221 important for calling somatic mutations.

222 Summing the stars earned for each of the five QC measure results in 66.4% of the  
223 normal/tumour sample pairs of the PCAWG being rated as 5 stars. Looking specifically

224 at the different projects (*Figure 5*), a more nuanced picture is available. The quality does  
225 not seem to be biased by tissue type (*Supplementary Figure S7*) based on detailed  
226 molecular subtypes of the tumours in PCAWG<sup>20</sup>, the difference seems to be more at the  
227 project level. Unfortunately, there is only limited project metadata on when and which  
228 protocol was used to sequence the samples. Detailed metadata was available for 95  
229 donors of the CLLE-ES project (concerning Chronic Lymphocytic Leukaemia), so it  
230 could be used as an example. Changes in protocol had an effect on the quality of the  
231 sequencing over the four years in which CLLE-ES samples were sequenced. For the  
232 CLLE-ES project, most notable was the change to a no PCR proband in 2012, which  
233 resulted in improvements to the measures of paired reads mapping to different  
234 chromosomes and evenness of coverage. This in turn resulted in a measurable change in  
235 somatic mutation calling coverage and improvement in star ratings (*Supplementary*  
236 *Figure S8*). We found similar results for a subset of 348 samples sequenced at the Broad  
237 Institute (*Supplementary Figure S9*), which had metadata recorded in CGHub<sup>21</sup> about the  
238 time and instruments used to sequence. We hypothesise that this will be true for other  
239 projects as well.

240 Having calculated the star rating for the sequences, it was interesting to see how our QC  
241 measures relate to the calling of somatic single nucleotide variants (SNVs)<sup>11</sup>, somatic  
242 insertion and deletions (indels)<sup>11</sup> and somatic structural variants (SVs)<sup>22</sup> in PCAWG. An  
243 advantage of using these PCAWG datasets is that four callers were used for each.  
244 Looking at the proportion of calls, which all four callers supported, gives us a good idea  
245 how the quality of sequencing influences the identification of unambiguous somatic  
246 mutations. While the proportion of calls supporting the four callers varies greatly by

247 sample, we find that the samples with four stars or more tended to have higher  
248 proportions than samples with less than four stars for SNVs, indels and SVs (with p-  
249 values of  $\sim 10^{-5}$ ,  $\sim 10^{-5}$ ,  $\sim 10^{-18}$  respectively, using the Mann-Whitney-U test, also see  
250 *Figure 6*).

251 Taking this analysis further we used linear regression models to further analyse the  
252 relation between the proportion of calls supported by four callers and the QC measures  
253 (see *Supplementary Tables S1-S3*). The results show that, an increasing percentage of  
254 paired reads mapping to different chromosomes in tumour samples, has a negative effect  
255 on the proportion of calls supported by four callers for SNVs, indels and SVs. For SNVs  
256 an increasing mean coverage in tumours has a significant positive effect on the proportion  
257 of calls supported by four callers. While for indels there is a significant negative effect on  
258 the proportion of calls supported by four callers by increasing unevenness (as measured  
259 by FWHM) in tumours. As in indels, the unevenness effect is also true in SVs as well as  
260 significant negative effects by increasing percentage of paired reads mapping to different  
261 chromosomes in normal samples and ratio of difference in edits between paired reads in  
262 tumour samples.

263 The results from this analysis suggest quality of sequencing, measured by our star rating,  
264 does have a measurable effect on the downstream analyses. As our QC measures reflect  
265 different aspects of sequencing quality, they also have varying levels of importance in  
266 using these sequences in the calling of SNVs, indels and SVs.

## 267 **Discussion**

268 The established star rating system allows grading the normal and tumour sample

269 sequences by quality in absence of information on how sequencing was carried out, what  
270 protocols were used and what problems may have occurred during the sequencing  
271 process. The system is not designed to be all encompassing, instead using a small amount  
272 of computational resources and time (compared to the actual aligning of the sequences),  
273 we get a good snapshot of the quality of the normal-tumour sample pair sequences on  
274 which to call somatic mutations. Likewise having graded the cancer genomes with our  
275 five-star system, we do not intend researchers to necessarily exclude the lower ranked  
276 cancer genomes, just to be wary of any conclusions based solely on the lower scoring  
277 genomes.

278 With our star rating system, we sent several samples in PCAWG to the exclusion list due  
279 to their poor performance in one of the QC measures. Due to the timing, this did not  
280 prevent the downstream analyses being performed. Though anecdotally it would have  
281 saved 55 days computational runtime for our one star sample. For all samples that  
282 remained, the QC star rating was embedded in the header of the variant call format files  
283 for use of the researchers within PCAWG, and when the data is released, to all  
284 researchers.

285 For those projects in PCAWG, which we had metadata, we found that sequencing quality  
286 has definitely improved over the time period 2009-2014 in which the samples sequenced.  
287 Our results for the CLLE-ES project suggest that in part a protocol change to PCR-free  
288 methods improved sequencing, as in line with best practices from a recent benchmarking  
289 exercise<sup>12</sup>.

290 Another advantage of our quality control is the link to the downstream analyses. In

291 aggregate, the higher the quality of the sequences, had a higher proportion of the somatic  
292 SNVs, indels, SVs identified, by all the callers for each type of somatic mutation. These  
293 results suggest overall that higher quality sequence will identify the true positive somatic  
294 mutations with higher probability. Our data would suggest that when pre-amplification of  
295 DNA is needed for WGS, for example DNA isolated from formalin fixed, paraffin  
296 embedded tissue, the star rating system will be helpful when the variants and mutations  
297 are interpreted.

298 We believe that our method can be adapted for similar projects that look to use whole  
299 genome sequences from a variety of sources. The thresholds we used based on our  
300 experience and applied to this dataset of 2959 cancer genomes can also be used as guide  
301 to quality of sequences. It is worth noting that they represent a trade-off of being severe  
302 enough to penalise poor quality while not discriminating against samples with valid  
303 biological causes. We also would recommend using our methods to ascertain the quality  
304 before downstream analyses by other groups. To enable others to use our approach, there  
305 is a Docker Container, which can be accessed at <https://github.com/eilslabs/PanCanQC>.  
306 We provide a framework for quality assessment, which opens the door to do large-scale  
307 meta-analysis in a more robust framework.

## 308 **Acknowledgements**

309 The authors would like to thank Jennifer Jennings and her colleagues at the Ontario  
310 Institute for Cancer Research (OICR) for their help in the administration of this working  
311 group.

312 JPW, MDS, SB, MG, JT and IGG are supported by the Ministerio de Economía, Industria  
313 y Competitividad and European Regional Development Fund (MINECO/FEDER  
314 BIO2015-71792-P), the Instituto de Salud Carlos III (ISCIII) and the Generalitat de  
315 Catalunya. In addition we have received funding from ELIXIR-EXCELERATE (EC  
316 H2020 #676559) and RD-Connect (EC FP7/2007-2013 #305444).

317 The work done by IB, KK, JW, DH, BH, RE and MS was supported by the BMBF-  
318 funded Heidelberg Center for Human Bioinformatics (HD-HuB) within the German  
319 Network for Bioinformatics Infrastructure (de.NBI) (#031A537A, #031A537C) and the  
320 BMBF-funded German ICGC-projects (ICGC-PedBrain: 109252 (German Cancer Aid),  
321 01KU1201A,B; ICGC-MMML: 01KU1002B and ICGC-DE-MINING: 01KU1505E).

322 ER, DL, MR, GS and GG would like to acknowledge G.G. MGH startup package and  
323 Broad funds.

324 KMR and PC are members of the Cancer Genome Project supported by a Wellcome  
325 Trust grant (098051).

326

## 327 **Author contributions**

328 JPW, IB, ER, KMR, KK, MDS and JW wrote the manuscript, helped develop and apply  
329 the methods and analysed the results.

330 SB, MG, DH, BH, DL, MP, MR, GS and JT contributed to the development of the  
331 methods.



332 RE, JK, DSG, PC, GG, MS and IGG provided project supervision; through feedback and  
333 the reviewing of the work done, as well as editing of the manuscript.

334 IB and JW constructed the Docker Container with code contributions from KK and  
335 KMR.

336 PCAWG-Tech and PCAWG-Network provided the data, metadata and the framework for  
337 this research.

338

339 **Competing financial interests**

340 The authors declare no competing financial interests.

341 **References**

- 342 1. International Cancer Genome Consortium et al. International network of cancer  
343 genome projects. *Nature* 464, 993–8 (2010).
- 344 2. Cancer Genome Atlas Research Network et al. The cancer genome atlas pan-  
345 cancer analysis project. *Nat Genet* 45, 1113–20 (2013).
- 346 3. Ceccarelli, M. et al. Molecular profiling reveals biologically discrete subsets and  
347 pathways of progression in diffuse glioma. *Cell* 164, 550–63 (2016).
- 348 4. Cancer Genome Atlas Network. Comprehensive genomic characterization of head  
349 and neck squamous cell carcinomas. *Nature* 517, 576–82 (2015).
- 350 5. Cancer Genome Atlas Research Network. Comprehensive molecular  
351 characterization of urothelial bladder carcinoma. *Nature* 507, 315–22 (2014).
- 352 6. Biankin, A. V. et al. Pancreatic cancer genomes reveal aberrations in axon  
353 guidance pathway genes. *Nature* 491, 399–405 (2012).
- 354 7. Lu, C. et al. Patterns and functional implications of rare germline variants across  
355 12 cancer types. *Nat Commun* 6, 10086 (2015).
- 356 8. Liu, J. et al. Genome and transcriptome sequencing of lung cancers reveal diverse  
357 mutational and splicing events. *Genome Res* 22, 2315–27 (2012).
- 358 9. Ramkissoon, L. A. et al. Genomic analysis of diffuse pediatric low-grade gliomas  
359 identifies recurrent oncogenic truncating rearrangements in the transcription  
360 factor *mybl1*. *Proc Natl Acad Sci U S A* 110, 8188–93 (2013).
- 361 10. Berger, M. F. et al. The genomic complexity of primary human prostate cancer.  
362 *Nature* 470, 214–20 (2011).
- 363 11. Simpson, J. et al. Detecting Somatic Mutations in 2,834 Cancer Whole Genomes.  
364 In preparation.
- 365 12. Alioto, T. S. et al. A comprehensive assessment of somatic mutation detection in  
366 cancer using whole-genome sequencing. *Nat Commun* 6, 10001 (2015).
- 367 13. Mokry, M et al. Accurate SNP and mutation detection by targeted custom  
368 microarray-based genomic enrichment of short-fragment sequencing libraries.  
369 *Nucleic Acids Res* (2010).
- 370 14. Kleinheinz et al. Copy-number variants from ACESeq. In preparation.

- 371 15. Cibulskis, K. et al. Sensitive detection of somatic point mutations in impure and  
372 heterogeneous cancer samples. *Nat Biotechnol* 31, 213–9 (2013).
- 373 16. Zook, J. M. et al. Integrating human sequence data sets provides a resource of  
374 benchmark snp and indel genotype calls. *Nat Biotechnol* 32, 246–51 (2014).
- 375 17. Korbel, J. O. & Campbell, P. J. Criteria for inference of chromothripsis in cancer  
376 genomes. *Cell* 152, 1226–36 (2013).
- 377 18. Oyola, S. O. et al. Optimizing illumina next-generation sequencing library  
378 preparation for extremely at-biased genomes. *BMC Genomics* 13, 1 (2012).
- 379 19. Chen, L., Liu, P., Evans, T. C. & Ettwiller, L. M. DNA damage is a pervasive  
380 cause of sequencing errors, directly confounding variant identification. *Science*  
381 355, 752–756 (2017).
- 382 20. Hoadley, K. et al. Supervised and unsupervised molecular classification of diverse  
383 tumour types from whole genome sequencing data. In preparation.
- 384 21. Wilks, C. et al. The cancer genomics hub (CGHub): overcoming cancer through  
385 the power of torrential data. *Database* (2014).
- 386 22. Yilong, L. et al. Patterns and mechanisms of structural variation in human  
387 cancers. In preparation.

388 **Figures**

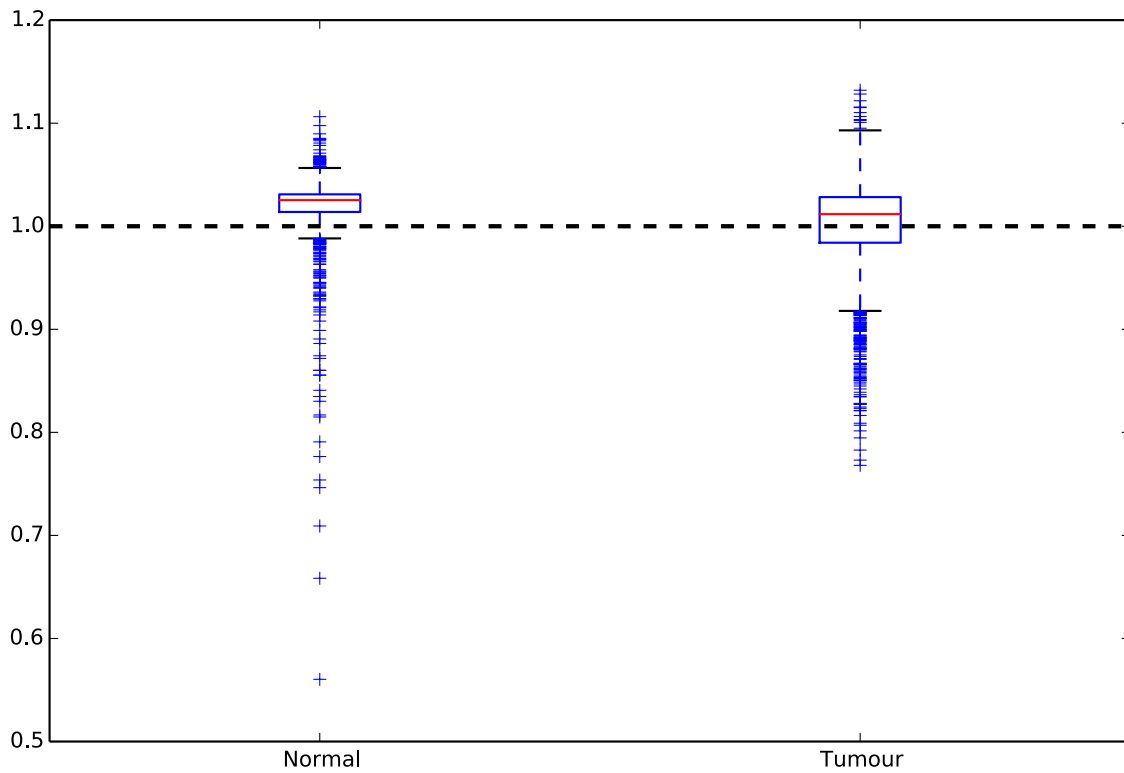

389

390 *Figure 1: Distribution of the median coverage over mean coverage ratios for normal and*  
391 *tumour samples. The horizontal dashed bar at 1 represents the value of an evenly covered*  
392 *sample. As shown in the plot the tumour samples have a greater spread of values than the*  
393 *normal, we hypothesize this is to be expected as tumours are more likely to have deletions*  
394 *and structural rearrangements, which will lead to less evenly covered sequence. The*  
395 *whiskers on each of the boxplots (0.99-1.06 for the normal and 0.92-1.09 for the tumour)*  
396 *were taken as thresholds for this measure.*

397 a)

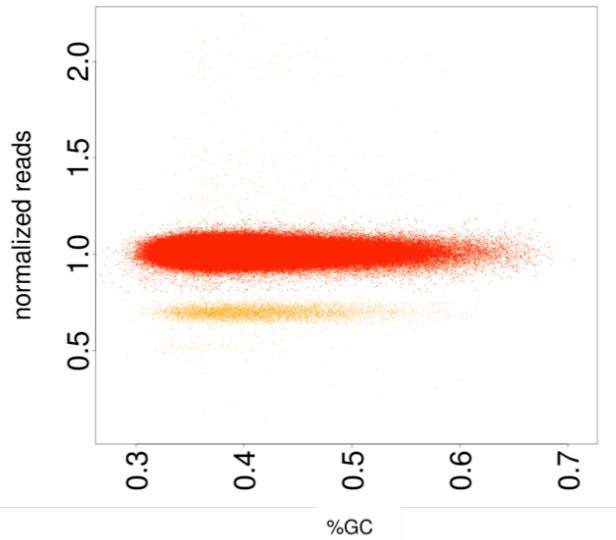

398

399 b)

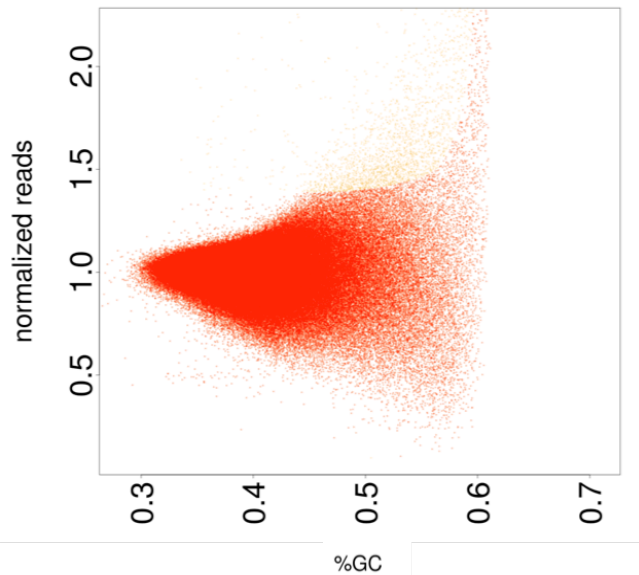

400

401 *Figure 2: GC content versus the normalised coverage for evenly covered sample (a) and*  
402 *unevenly covered sample (b). The main cloud, corresponding to the main copy number*  
403 *state of the samples, is indicated in red. The yellow cloud represents a different copy*  
404 *number state of a copy number aberrant region. FWHM is calculated on the main copy*  
405 *number state.*

406 a)

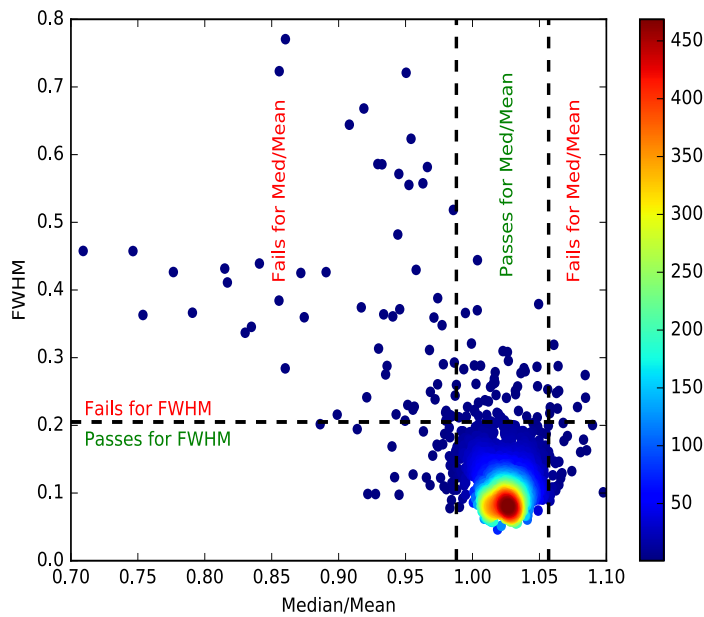

407

408 b)

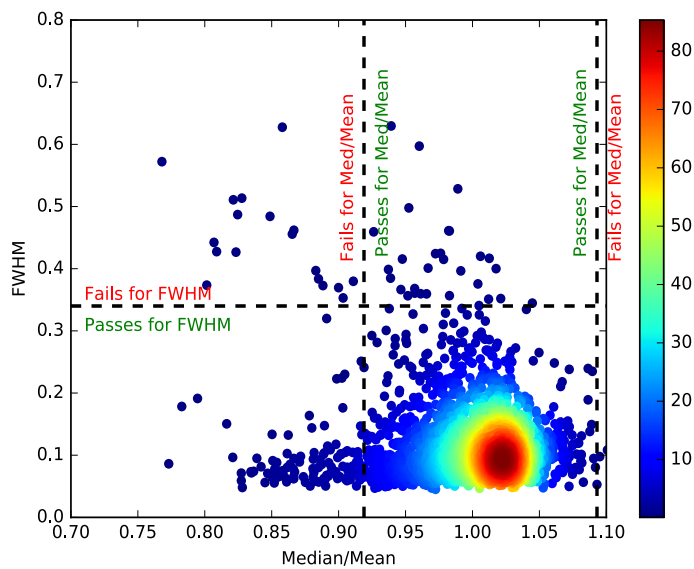

409

410 *Figure 3: Density scatter plot comparing the two evenness of coverage measures for*  
411 *normal (a) and tumour (b). The number of samples overlapping is reflected by the colour*  
412 *at that point as shown by the legend. The dashed lines reflect the thresholds for the*  
413 *evenness measures. These graphs show that while there are certain samples both methods*  
414 *pick out as being unevenly covered, there are also samples picked out by one of the two.*

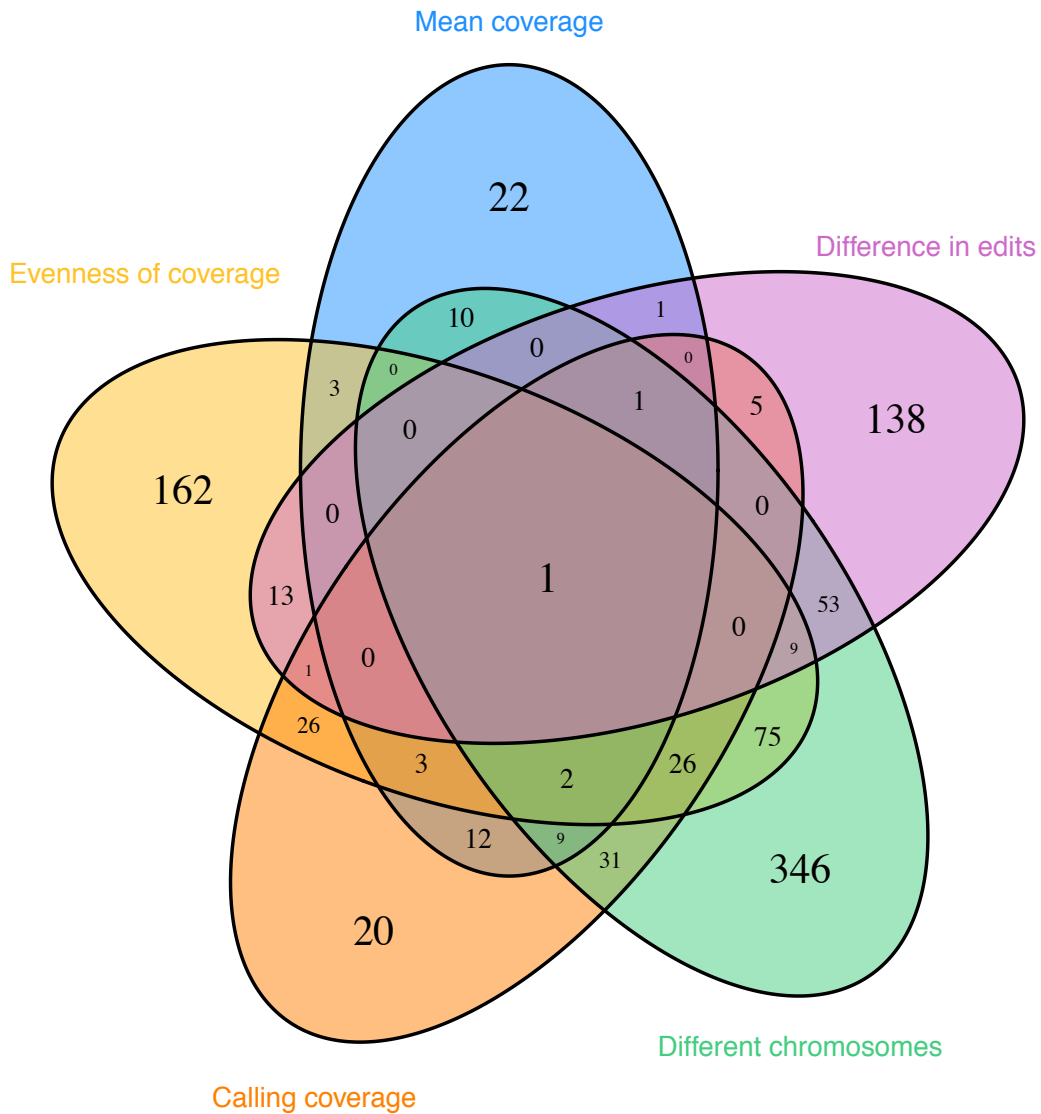

415

416 *Figure 4: Venn diagram showing for which QC measure sample pairs were penalised for.*  
417 *The outside numbers show that each QC measures penalises a fair number of sample*  
418 *pairs uniquely. Looking at the overlaps between QC measures, while some measures are*  
419 *closer to each other than others, they all maintain a large degree of independence.*

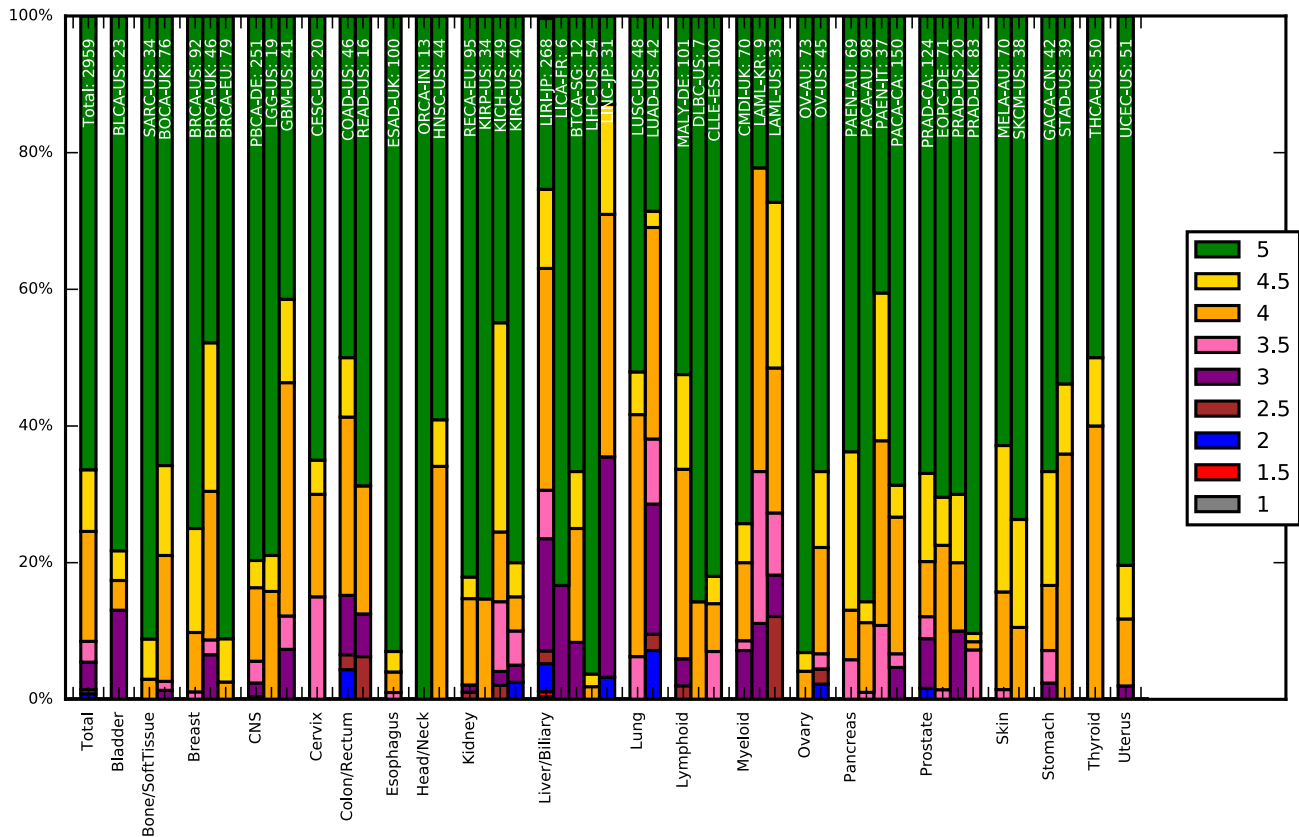

421 *Figure 5: Distribution of the star ratings for the PCAWG genomes, grouped by tissue*  
 422 *type (as labelled along the x-axis), and then project. The project name and number of*  
 423 *samples in the project are labelled at the top of the bar. The colour of the bar reflects*  
 424 *what percentage of samples in the project have that star rating (corresponding to the*  
 425 *legend). The bar on the far left shows the results for all samples. The plot demonstrates*  
 426 *the varying quality of different projects - differences we believe come from when the*  
 427 *genome was sequenced and the sequencing protocol used.*



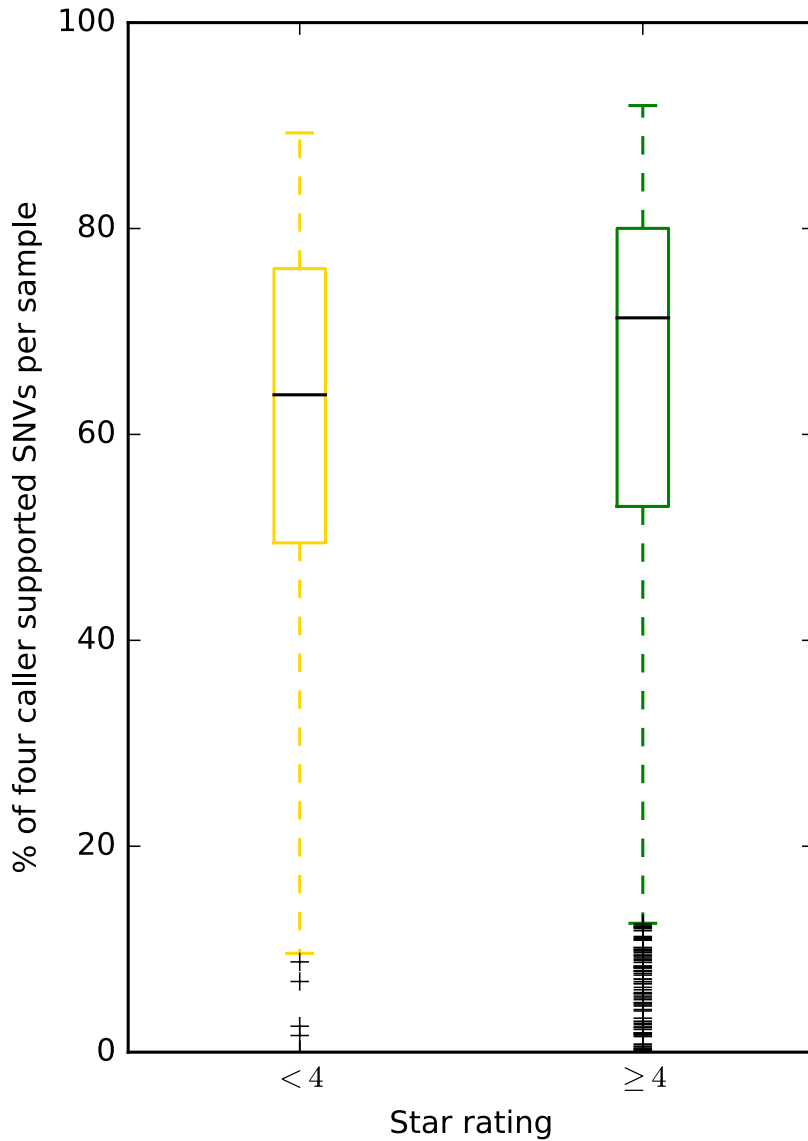

428

429 *Figure 6a: Samples with four stars or greater tend to have a higher the proportion of*

430 *somatic single nucleotide variants (SNV) calls supported by four callers than samples*

431 *with fewer than four stars. This is significant using the Mann-Whitney U test, with p-*

432 *value  $\sim 10^{-5}$ .*

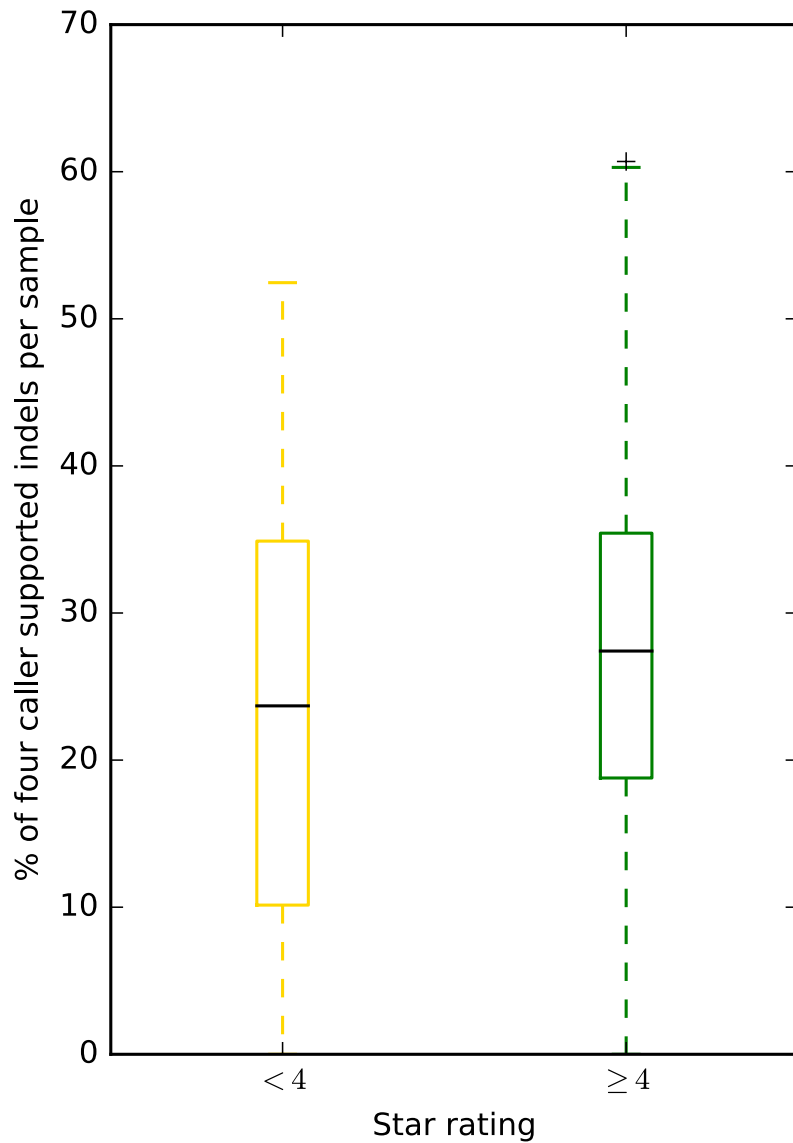

433

434 *Figure 6b: Samples with four stars or greater tend to have a higher the proportion of*  
435 *somatic insertion and deletion (indel) calls supported by four callers than samples with*  
436 *fewer than four stars. This is significant using the Mann-Whitney U test, with p-value ~*  
437 *10<sup>-5</sup>.*

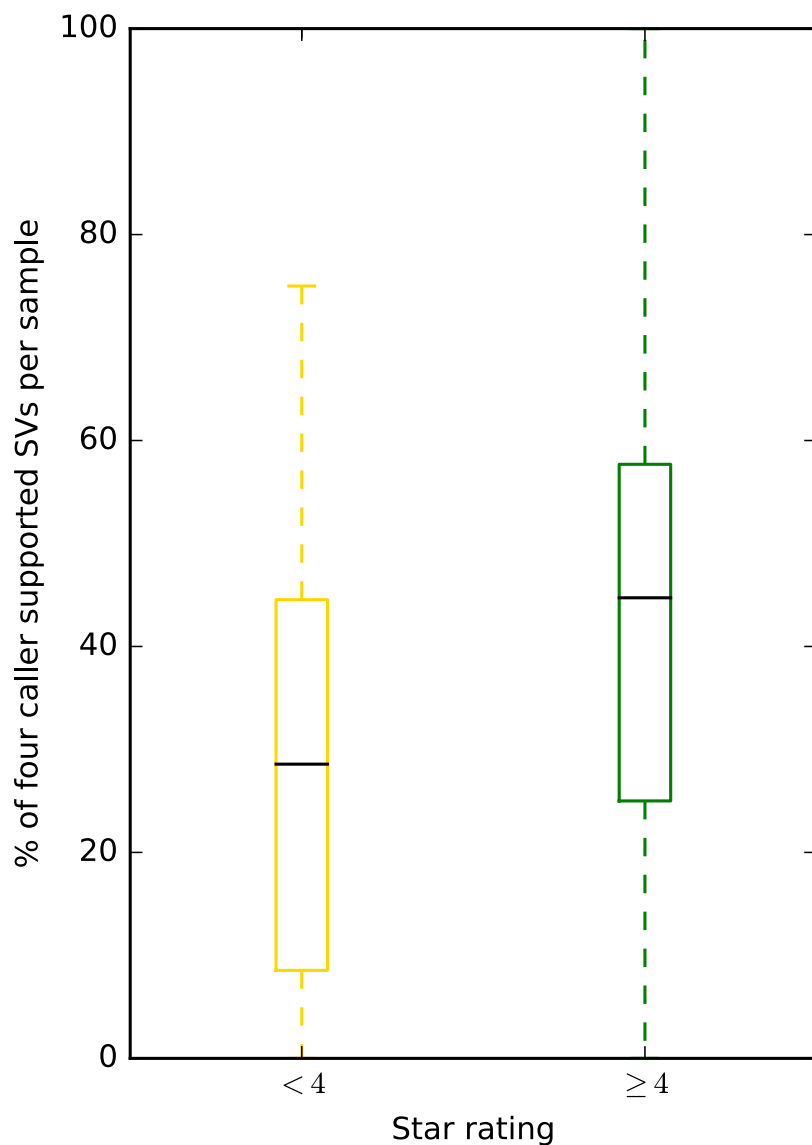

438

439 *Figure 6c: Samples with four stars or greater tend to have a higher the proportion of*  
440 *somatic structural variant (SV) calls supported by four callers than samples with fewer*  
441 *than four stars. This is significant using the Mann-Whitney U test, with p-value  $\sim 10^{-8}$ .*
